# Supplementary material for: The Influence of Electroconvulsive Therapy (ECT) on Brain-Derived Neurotrophic Factor (BDNF) Plasma Level in Patients with Schizophrenia—A Systematic Review and Meta-Analysis
Source: MDPI journal article supplement (doi:10.3390/jcm12175728), 2023-09-02
Supplement: s1 [file s1]

**Table S1.** Test of Homogeneity [24]

|         | Chi-square<br>(Q statistic) | Degrees<br>of<br>freedom | Significa<br>nce. |
|---------|-----------------------------|--------------------------|-------------------|
| Overall | 10,342                      | 5                        | 0,066             |

**Table S2.** Heterogeneity Measures [24]

|         | Measure       | Value |
|---------|---------------|-------|
| Overall | Tau-squared   | 0,059 |
|         | H-squared     | 2,096 |
|         | I-squared (%) | 52,3  |
